# Supplementary material
Source: PubMed Central journal article supplement (PMC8970839)
Supplement: nmab128_supplemental_file.pdf [file nmab128_supplemental_file.pdf]

# The role of immunomodulatory nutrients in alleviating complications related to SARS-CoV-2 – A scoping review

Parisa Jandaghi  
 “Online Supplementary Material”

Database(s): **Ovid MEDLINE(R)** 1946 to January Week 5 2021

Search Strategy:

| #  | Searches                                                                            | Results |
|----|-------------------------------------------------------------------------------------|---------|
| 1  | exp Vitamin D/ or vitamin D.mp.                                                     | 79383   |
| 2  | exp Calcitriol/ or calcitriol.mp.                                                   | 21259   |
| 3  | Vitamin A.mp.                                                                       | 33956   |
| 4  | retinol.mp. or exp Vitamin A/                                                       | 51892   |
| 5  | vitamin E.mp. or exp Vitamin E/                                                     | 41758   |
| 6  | vitamin K.mp.                                                                       | 25897   |
| 7  | exp Ascorbic Acid/ or vitamin C.mp.                                                 | 49692   |
| 8  | ascorbic acid.mp. or exp Ascorbic Acid/                                             | 53298   |
| 9  | vitamin B6.mp. or exp Vitamin B 6/                                                  | 17984   |
| 10 | vitamin B12.mp. or exp Vitamin B 12/                                                | 27680   |
| 11 | folic acid.mp. or exp Folic Acid/                                                   | 49588   |
| 12 | exp Zinc Sulfate/ or exp Zinc/ or Zinc.mp.                                          | 132568  |
| 13 | copper.mp. or exp Copper/                                                           | 105341  |
| 14 | exp Selenium/ or selenium.mp.                                                       | 32051   |
| 15 | exp Fatty Acids, Omega-3/ or omega-3.mp.                                            | 29438   |
| 16 | exp Micronutrients/ or micronutrient*.mp.                                           | 669497  |
| 17 | covid-19.mp.                                                                        | 54899   |
| 18 | SARS-CoV-2.mp.                                                                      | 23359   |
| 19 | 1 or 2 or 3 or 4 or 5 or 6 or 7 or 8 or 9 or 10 or 11 or 12 or 13 or 14 or 15 or 16 | 873442  |
| 20 | 17 or 18                                                                            | 55167   |
| 21 | 19 and 20                                                                           | 558     |
| 22 | limit 21 to (english language and humans)                                           | 528     |
| 23 | limit 22 to yr="2020 -Current"                                                      | 528     |
